# Supplementary figures and images for: Fabrication of nanoporous copper with tunable ligaments and promising sonocatalytic performance by dealloying Cu–Y metallic glasses
Source: Royal Society of Chemistry journal article supplement (doi:10.1039/c7ra08390d), 2017-01-01

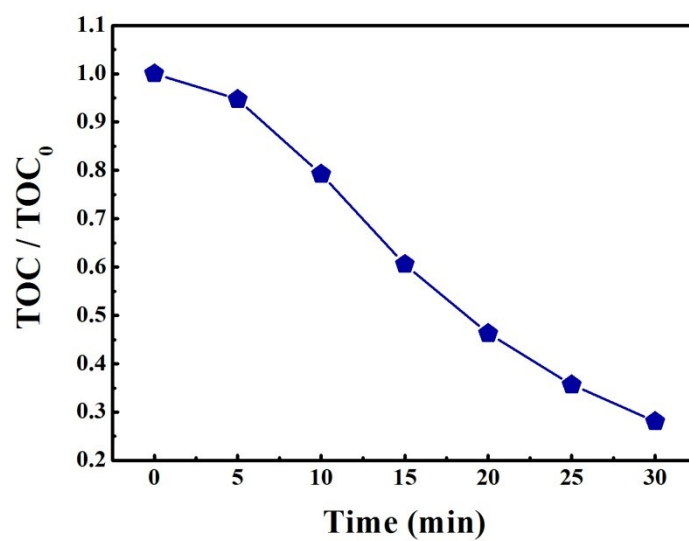

**Fig. S1.** The TOC evolution as a function of irradiation time in NPC-72 sono-catalytic process.

Supplement: c7ra08390d1.pdf [file c7ra08390d1.pdf]
